# Supplementary material for: Enhancing growth and suppressing root rot in Phaseolus vulgaris using ginger powder derived natural antifungal agent for optimum disease control and crop health
Source: Research Square preprint supplement (doi:10.21203/rs.3.rs-7054212/v1), 2025-08-04
Supplement: Supplementary file 1 [file 8b843fe43714df63f8ce224b.docx]

**Supplemental Information**

Shazia Alam1(shaziaalam1212@gmail.com), Asma Hanif2*(asma.hanif@uok.edu.pk), Sumara Shaheen3(sumarashaheen16@gmail.com), Min Zhu1 ([minzhu@yzu.edu.cn](mailto:minzhu@yzu.edu.cn)). Mohammad Mehdizadeh(mehdizade.mohammad@gmail.com) Zainul Abideen5*([zuabideen@uok.edu.pk](mailto:zuabideen@uok.edu.pk))

1College of Agriculture, Yangzhou University, 48 Wenhui Rd, Yangzhou, Jiangsu, China. 2Department of Botany, University of Karachi, Pakistan

3Department of Food Science and Technology, University of Karachi, Pakistan

4Department of Agronomy and Plant Breeding, Faculty of Agriculture and Natural Resources, University of Mohaghegh Ardabili, Ardabil, Iran.

5Dr. Muhammad Ajmal Khan Institute of Sustainable Halophyte Utilization, University of Karachi, Karachi, 75270, Pakistan

Corresponding author email: [zuabideen@uok.edu.pk](mailto:zuabideen@uok.edu.pk): [asma.hanif@uok.edu.pk](mailto:asma.hanif@uok.edu.pk)


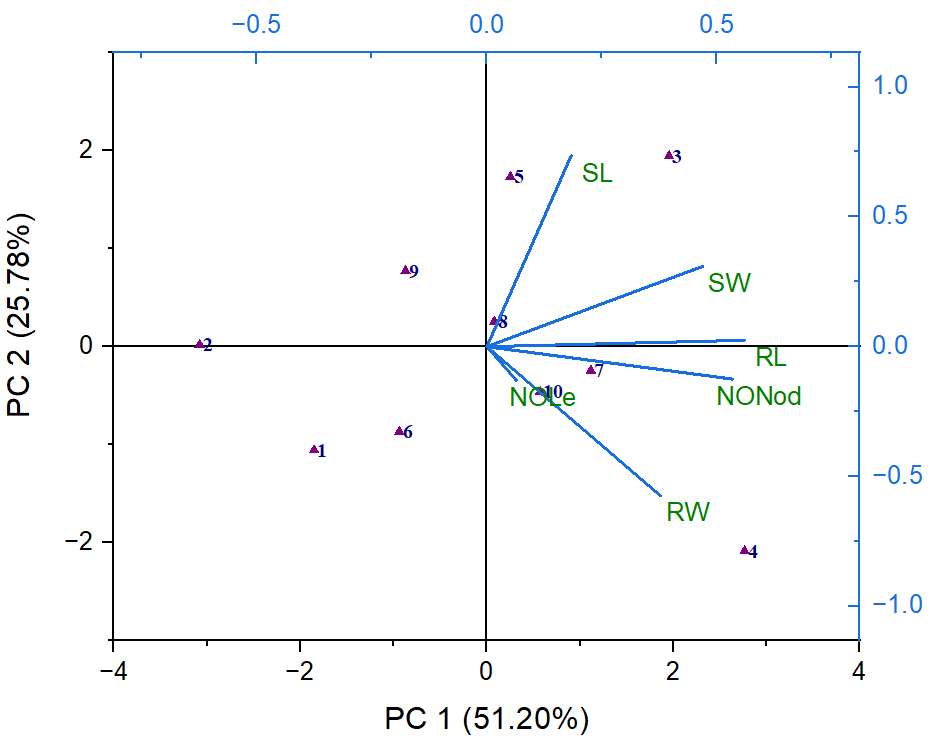


Fig 1: Principal component analysis (PC1 and PC2) of plant biomass (root-shoot length, root-shoot weight, no. of leaves, and no. of nodules) for the treatments, including organic fertilizer and fertilizer+ seed treatment with fresh ginger compared to the untreated control plants of red beans are shown in the biplot.

Whereas RL=root length, RW=root weight, SL=shoot length, SW=shoot weight, NOLE= no. of leaves, NONod=no. of nodules.

1=Control, 2=Seed treatment, 3=Cow dung (CD), 4=Goat dung (GD), 5=DAP, 6=Fudan (F), 7=CD+ seed treatment,

8=GD + seed treatment, 9=DAP + seed treatment, 10=F + seed treatment


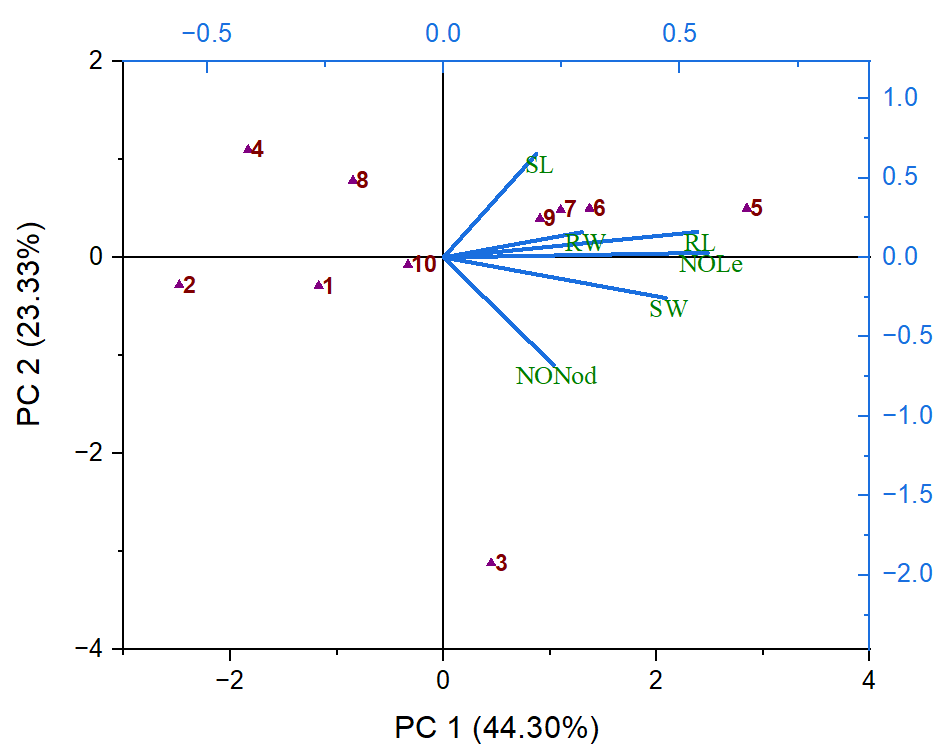


Fig 2: Principal component analysis (PC1 and PC2) of plant biomass (root-shoot length, root-shoot weight, no. of leaves, and no. of nodules) for the treatments, including organic fertilizer and fertilizer+ seed treatment with dry ginger powder compared to the untreated control plants of red beans are shown in the biplot.

Whereas, RL=root length, RW=root weight, SL=shoot length, SW=shoot weight, NOLE= no. of leaves, NONod=no. of nodules.

1=Control, 2=Seed treatment, 3=Cow dung (CD), 4=Goat dung (GD), 5=DAP, 6=Fudan (F), 7=CD+ seed treatment, 8=GD + seed treatment, 9=DAP + seed treatment, 10=F + seed treatment


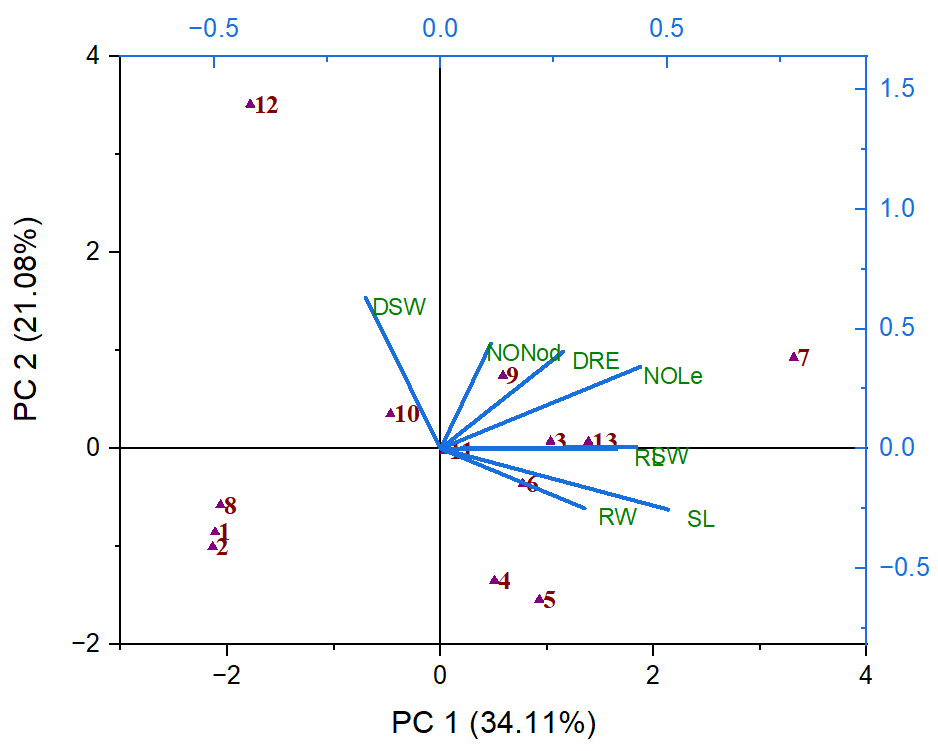


Fig 3: Principal component analysis (PC1 and PC2) of plant biomass (root-shoot length, root-shoot weight, no. of leaves, and no. of nodules) for the treatments, including soil amendment, soil drenching, and seed treatment by fresh ginger and ginger dry powder on the growth of red beans compared to the untreated control plants are shown in the biplot.

Whereas,

RL=root length, RW=root weight, SL=shoot length, SW=shoot weight, NOLE= no. of leaves, NONod=no. of nodules, DSW=dry shoot weight, and DRW=dry root weight.

1=Control, 2=100% S.T with FG, 3=75% S.T with FG, 4=100%S.T with DP, 5=75%S.T with DP, 6=100% S.D with FG, 7=75% S.D with FG, 8=100%S.D with DP, 9=75%S.D with DP, 10=0.5 % S.A with FG, 11=0.1 % S.A with FG, 12=0.5 % S.A with DG, and 13=0.1 % S.A with DG.
